# Supplementary material
Source: PubMed Central journal article supplement (PMC1838981)

A Ad-Prox1 Mut

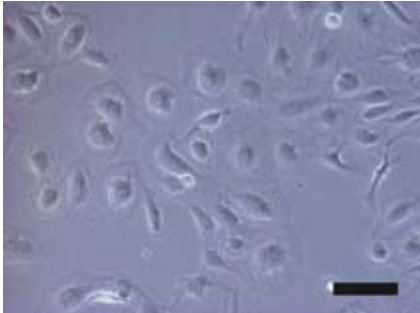

B Ad-Prox1 WT

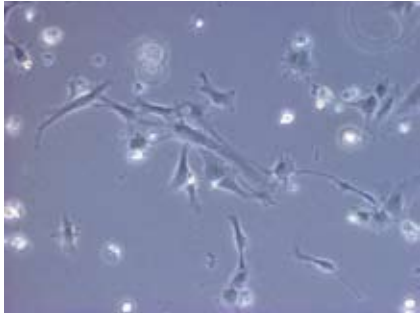

C Null+ Prox1 WT

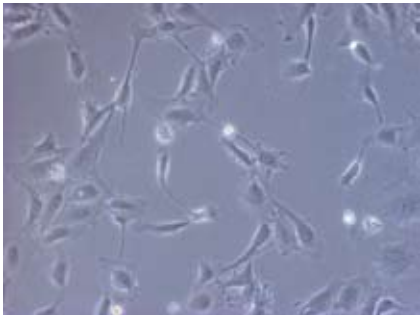

D Prox1 WT  
+ VEGFR3 d.n. Mut

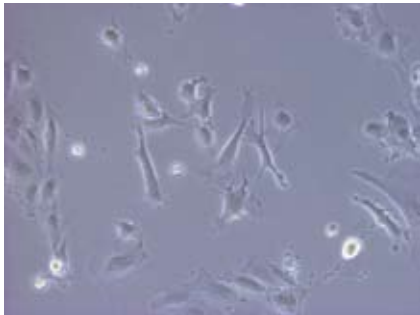

E Null  
+ VEGFR3 WT

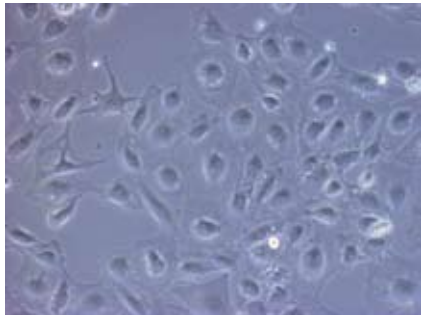

Supplement: mbc_E06-09-0780_1.pdf [file mbc_E06-09-0780_1.pdf]
